# Supplementary material
Source: MDPI journal article supplement (https://www.mdpi.com/2072-4292/15/5/1438)
Supplement: s1 [file s1]

## Supplementary Material

### **Landscape patterns and topographic features affect seasonal river water quality at catchment and buffer scales**

Li Deng <sup>1</sup>, Wanshu Li <sup>2,4</sup>, Xiaojie Liu <sup>2,4,\*</sup>, Yazhu Wang <sup>3</sup>, Lingqing Wang <sup>2,4</sup>

<sup>1</sup> *Ecological Environment Planning and Environmental Protection Technology Center of Qinghai Province, Xining 810007, China*

<sup>2</sup> *Key Laboratory of Natural Resource Coupling Process and Effects, Ministry of Natural Resources, Institute of Geographic Sciences and Natural Resources Research, Chinese Academy of Sciences, Beijing 100101, China*

<sup>3</sup> *Key Laboratory of Watershed Geographic Sciences, Nanjing Institute of Geography and Limnology, Chinese Academy of Sciences, Nanjing 210008, China*

<sup>4</sup> *University of Chinese Academy of Sciences, Beijing 100049, China*

\*Corresponding author: Xiaojie Liu (liuxj@igsnr.ac.cn)

**Table S1** Descriptions of landscape metrics used in the study.

| Classification                   | Variable                    | Description                                                                                                                                                                                                                                      |
|----------------------------------|-----------------------------|--------------------------------------------------------------------------------------------------------------------------------------------------------------------------------------------------------------------------------------------------|
| Topographic<br>feature metrics   | Regional slope (Slope)      | The mean slope of the study region.                                                                                                                                                                                                              |
|                                  | Regional relief (HD)        | The elevation difference in the study region [1].                                                                                                                                                                                                |
|                                  | Hypsometric integral (HI)   | $HI = (H_{\text{mean}} - H_{\text{min}}) / (H_{\text{max}} - H_{\text{min}})$ , where $H_{\text{max}}$ , $H_{\text{min}}$ and $H_{\text{mean}}$ represent the highest point, lowest point and the average elevation of the region, respectively. |
| Landscape pattern<br>metrics [2] | Cropland                    | The proportion of cropland in the study region.                                                                                                                                                                                                  |
|                                  | Forest                      | The proportion of forest in the study region.                                                                                                                                                                                                    |
|                                  | Shrubland                   | The proportion of shrubland in the study region.                                                                                                                                                                                                 |
|                                  | Grassland                   | The proportion of grassland in the study region.                                                                                                                                                                                                 |
|                                  | Water                       | The proportion of water area in the study region.                                                                                                                                                                                                |
|                                  | Barren land                 | The proportion of barren land in the study region.                                                                                                                                                                                               |
|                                  | Impervious layer            | The proportion of impervious layer in the study region.                                                                                                                                                                                          |
|                                  | Patch density (PD)          | Number of patches per unit area of the respective land cover type (number per 100 hectares).                                                                                                                                                     |
|                                  | Landscape shape index (LSI) | Measures the perimeter-to-area ratio for the landscape at the class level.                                                                                                                                                                       |
|                                  | Largest patch index (LPI)   | Proportion of total landscape area occupied by the largest patch in the patch type.                                                                                                                                                              |

**Table S2** Summaries for landscape metrics from 2018 to 2020 at catchment and buffer scales.

| Variable                                 | Catchment scale |        |        |        |        |        | Buffer scale |       |       |       |       |       |
|------------------------------------------|-----------------|--------|--------|--------|--------|--------|--------------|-------|-------|-------|-------|-------|
|                                          | 2018            |        | 2019   |        | 2020   |        | 2018         |       | 2019  |       | 2020  |       |
|                                          | Mean            | SD     | Mean   | SD     | Mean   | SD     | Mean         | SD    | Mean  | SD    | Mean  | SD    |
| Slope (°)                                | 9.23            | 4.80   | 9.23   | 4.80   | 9.23   | 4.80   | 4.42         | 3.61  | 4.42  | 3.61  | 4.42  | 3.61  |
| HD (m)                                   | 951.00          | 473.77 | 951.00 | 473.77 | 951.00 | 473.77 | 13.00        | 11.61 | 13.00 | 11.61 | 13.00 | 11.61 |
| HI                                       | 0.14            | 0.07   | 0.14   | 0.07   | 0.14   | 0.07   | 0.41         | 0.14  | 0.41  | 0.14  | 0.41  | 0.14  |
| Cropland (%)                             | 47.93           | 16.30  | 48.18  | 16.05  | 49.72  | 14.93  | 26.19        | 30.83 | 26.54 | 30.50 | 34.37 | 28.97 |
| Forest (%)                               | 27.26           | 23.50  | 26.89  | 23.24  | 25.17  | 22.16  | 6.07         | 17.17 | 6.07  | 17.17 | 3.21  | 9.09  |
| Grassland (%)                            | 2.79            | 1.79   | 2.75   | 1.76   | 2.68   | 1.77   | 2.50         | 7.07  | 2.14  | 6.06  | 1.07  | 3.03  |
| Water (%)                                | 3.07            | 4.04   | 3.02   | 3.94   | 2.81   | 3.65   | 13.3         | 15.18 | 10.53 | 14.15 | 9.76  | 14.49 |
| Impervious layer (%)                     | 18.91           | 8.00   | 19.11  | 8.11   | 19.58  | 8.36   | 51.94        | 30.17 | 54.72 | 31.54 | 51.58 | 30.73 |
| PD <sub>crop</sub> (n km <sup>-2</sup> ) | 3.04            | 1.39   | 2.88   | 1.32   | 2.61   | 1.08   | 43.89        | 33.58 | 47.86 | 29.25 | 51.83 | 33.52 |
| PD <sub>for</sub> (n km <sup>-2</sup> )  | 1.51            | 0.93   | 1.38   | 0.84   | 1.52   | 0.98   | 3.97         | 11.22 | 3.97  | 11.22 | 7.94  | 22.45 |
| PD <sub>gra</sub> (n km <sup>-2</sup> )  | 3.33            | 2.51   | 3.19   | 2.41   | 3.08   | 2.39   | 7.94         | 22.45 | 7.94  | 22.45 | 7.94  | 22.40 |
| PD <sub>wat</sub> (n km <sup>-2</sup> )  | 0.51            | 0.59   | 0.48   | 0.56   | 0.50   | 0.59   | 36.2         | 36.20 | 36.20 | 36.20 | 31.99 | 33.94 |
| PD <sub>imp</sub> (n km <sup>-2</sup> )  | 2.36            | 0.65   | 2.35   | 0.64   | 2.36   | 0.63   | 48.1         | 24.40 | 48.10 | 24.40 | 48.10 | 24.40 |
| LSI <sub>crop</sub>                      | 67.86           | 26.92  | 65.10  | 25.62  | 64.08  | 25.33  | 1.37         | 0.86  | 1.49  | 0.69  | 1.52  | 0.67  |
| LSI <sub>for</sub>                       | 42.93           | 18.87  | 40.72  | 18.20  | 40.70  | 18.54  | 0.18         | 0.51  | 0.18  | 0.51  | 0.20  | 0.56  |
| LSI <sub>gra</sub>                       | 69.47           | 41.16  | 67.51  | 39.99  | 65.88  | 39.44  | 0.21         | 0.59  | 0.28  | 0.78  | 0.19  | 0.53  |
| LSI <sub>wat</sub>                       | 29.73           | 32.66  | 28.35  | 30.71  | 27.84  | 30.51  | 0.89         | 0.76  | 0.87  | 0.75  | 0.83  | 0.73  |
| LSI <sub>imp</sub>                       | 69.68           | 38.41  | 68.40  | 36.91  | 67.92  | 36.14  | 1.51         | 0.31  | 1.52  | 0.30  | 1.48  | 0.32  |
| LPI <sub>crop</sub> (%)                  | 35.30           | 20.31  | 35.51  | 20.02  | 36.45  | 19.92  | 22.85        | 30.72 | 23.20 | 30.44 | 28.58 | 29.50 |
| LPI <sub>for</sub> (%)                   | 14.62           | 16.89  | 14.53  | 16.85  | 12.14  | 15.56  | 6.79         | 19.19 | 6.79  | 19.19 | 2.14  | 6.06  |
| LPI <sub>gra</sub> (%)                   | 0.11            | 0.10   | 0.11   | 0.10   | 0.11   | 0.11   | 1.79         | 5.05  | 1.43  | 4.04  | 0.71  | 2.02  |
| LPI <sub>wat</sub> (%)                   | 1.06            | 1.24   | 1.06   | 1.25   | 1.03   | 1.22   | 8.24         | 9.94  | 6.09  | 8.82  | 6.09  | 8.82  |

|                        |      |      |      |      |      |      |       |       |       |       |       |       |
|------------------------|------|------|------|------|------|------|-------|-------|-------|-------|-------|-------|
| LPI <sub>imp</sub> (%) | 6.87 | 3.94 | 6.95 | 4.00 | 7.31 | 4.20 | 50.30 | 31.16 | 52.45 | 32.49 | 50.30 | 31.16 |
|------------------------|------|------|------|------|------|------|-------|-------|-------|-------|-------|-------|

The content in parentheses represents the unit. HI, LSI<sub>crop</sub>, LSI<sub>for</sub>, LSI<sub>gra</sub>, LSI<sub>wat</sub>, and LSI<sub>imp</sub> have no units. Abbreviations: SD, standard deviation; Slope, regional slope; HD, regional relief; HI, hypsometric integral. Cropland, Forest, Grassland, Water, and Impervious layer represent the proportion of cropland, forest, grassland, water, and impervious layer, respectively. PD<sub>crop</sub>, PD<sub>for</sub>, PD<sub>gra</sub>, PD<sub>wat</sub>, and PD<sub>imp</sub>, represent patch density of cropland, forest, grassland, water, and impervious layer, respectively. LSI<sub>crop</sub>, LSI<sub>for</sub>, LSI<sub>gra</sub>, LSI<sub>wat</sub>, and LSI<sub>imp</sub>, represent the landscape shape index of cropland, forest, grassland, water, and impervious layer, respectively. LPI<sub>crop</sub>, LPI<sub>for</sub>, LPI<sub>gra</sub>, LPI<sub>wat</sub>, and LPI<sub>imp</sub>, denote the largest patch index of cropland, forest, grassland, water, and impervious layer, respectively.

.

**Table S3**

The explained variation proportion of redundancy analysis (RDA) for the water quality with landscape metrics as constraining variables.

| Scale           | Season     | Explained variation (%) |             |         |
|-----------------|------------|-------------------------|-------------|---------|
|                 |            | First axis              | Second axis | Total   |
| Catchment scale | Wet season | 40.2***                 | 7.8*        | 53.3*** |
|                 | Dry season | 51.7***                 | 15.0***     | 71.8*** |
| Buffer scale    | Wet season | 39.0***                 | 7.9*        | 54.4*** |
|                 | Dry season | 44.7***                 | 6.8         | 55.1*** |

\* and \*\*\* indicate the statistical significances at  $p < 0.05$  and  $p < 0.001$ , respectively.

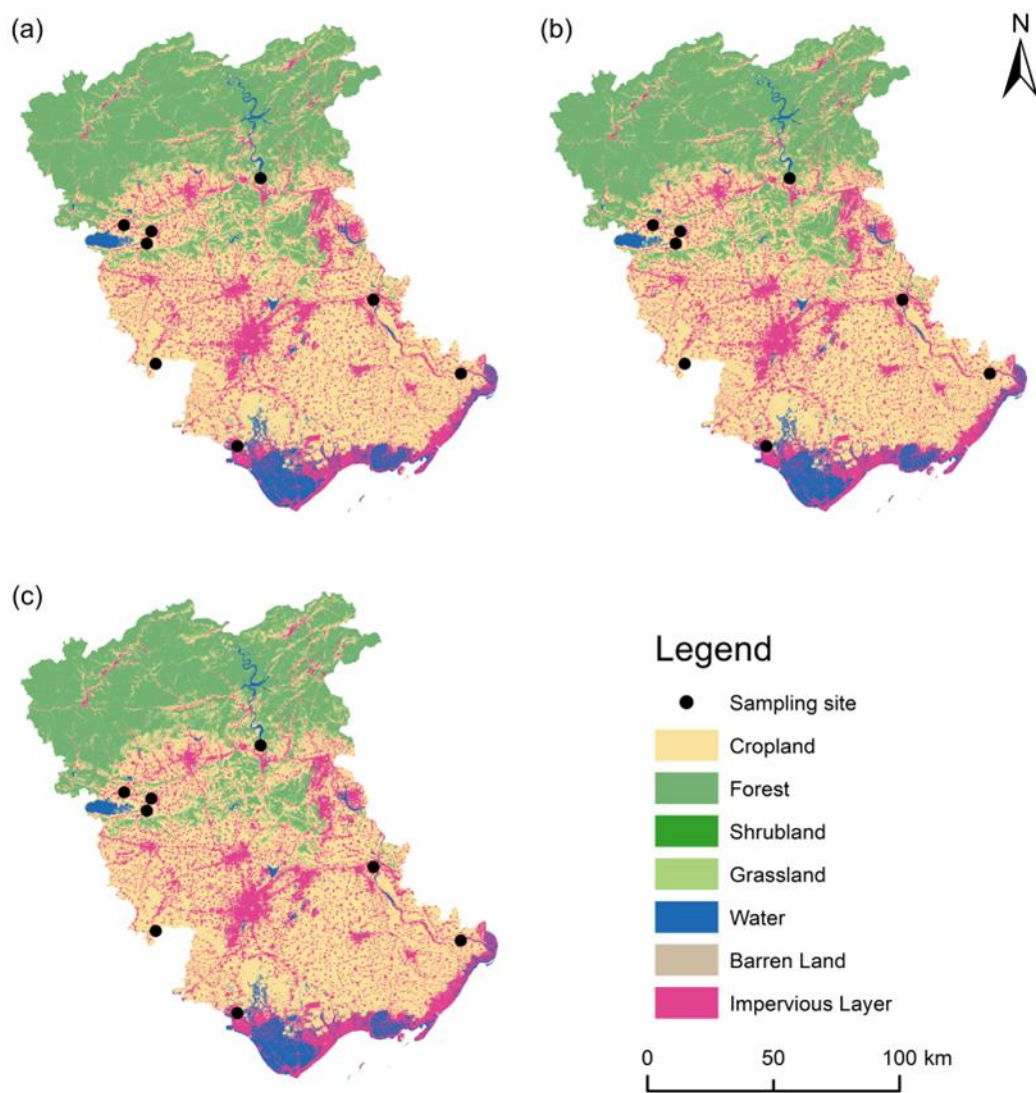

**Figure. S1.** Land cover of the study region in 2018 (a), 2019 (b), and 2020 (c).

## References

1. Ai, L.; Shi, Z.H.; Yin, W.; Huang, X. Spatial and Seasonal Patterns in Stream Water Contamination across Mountainous Watersheds: Linkage with Landscape Characteristics. *Journal of Hydrology* **2015**, *523*, 398–408, doi:10.1016/j.jhydrol.2015.01.082.
2. Wu, J.; Lu, J. Spatial Scale Effects of Landscape Metrics on Stream Water Quality and Their Seasonal Changes. *Water Research* **2021**, *191*, 116811, doi:10.1016/j.watres.2021.116811.
